# Supplementary material for: The Relationship Between Fear of COVID-19 and Depression, Anxiety, and Stress
Source: Atypon-hosted journal article supplement (doi:10.1027/1016-9040/a000464), 2021-10-01
Supplement: 1016-9040_a000464_esm1.pdf [file 1016-9040_a000464_esm1.pdf]

| #  | Author/s(year)               | Total % | Total Score | Item#1<br>Were the aims/objectives of the study clear? | Item#2<br>Was the study design appropriate for the stated aim(s)? | Item#3<br>Was the sample size justified? | Item#4<br>Was the target/reference population clearly defined? (Is it clear who the research was about?) | Item#5<br>Was the sample frame taken from an appropriate population base so that it closely represented the target/reference population | Item#6<br>Was the selection process likely to select subjects/participants that were representative of the target/reference population under | Item#7<br>Were measures undertaken to address and categorise non-responders? | Item#8<br>Were the risk factor and outcome variables measured appropriate to the aims of the study? | Item#9<br>Were the risk factor and outcome variables measured correctly using instruments/measurements that had been trialled, piloted or published previously? | Item#10<br>Is it clear what was used to determine statistical significance and/or precision estimates? (eg, p values, CIs) |
|----|------------------------------|---------|-------------|--------------------------------------------------------|-------------------------------------------------------------------|------------------------------------------|----------------------------------------------------------------------------------------------------------|-----------------------------------------------------------------------------------------------------------------------------------------|----------------------------------------------------------------------------------------------------------------------------------------------|------------------------------------------------------------------------------|-----------------------------------------------------------------------------------------------------|-----------------------------------------------------------------------------------------------------------------------------------------------------------------|----------------------------------------------------------------------------------------------------------------------------|
| 1  | Alyami et al 2020            | 80      | 16          | 1                                                      | 1                                                                 | 0                                        | 1                                                                                                        | 1                                                                                                                                       | 1                                                                                                                                            | 0                                                                            | 1                                                                                                   | 1                                                                                                                                                               | 1                                                                                                                          |
| 2  | Bitan et al 2020             | 85      | 17          | 1                                                      | 1                                                                 | 0                                        | 1                                                                                                        | 1                                                                                                                                       | 1                                                                                                                                            | 0                                                                            | 1                                                                                                   | 1                                                                                                                                                               | 1                                                                                                                          |
| 3  | Labrague- Leodoro et al 2020 | 80      | 16          | 1                                                      | 1                                                                 | N.K.                                     | 1                                                                                                        | 1                                                                                                                                       | 1                                                                                                                                            | 0                                                                            | 1                                                                                                   | 1                                                                                                                                                               | 1                                                                                                                          |
| 4  | Bakioglu et al 2020          | 85      | 17          | 1                                                      | 1                                                                 | 1                                        | 1                                                                                                        | 1                                                                                                                                       | 0                                                                                                                                            | 0                                                                            | 1                                                                                                   | 1                                                                                                                                                               | 1                                                                                                                          |
| 5  | Satici et al 2020a           | 80      | 16          | 1                                                      | 1                                                                 | 0                                        | 1                                                                                                        | 1                                                                                                                                       | 0                                                                                                                                            | 0                                                                            | 1                                                                                                   | 1                                                                                                                                                               | 1                                                                                                                          |
| 6  | Ahorsu et al 2020            | 90      | 18          | 1                                                      | 1                                                                 | 1                                        | 1                                                                                                        | 1                                                                                                                                       | 0                                                                                                                                            | N.K.                                                                         | 1                                                                                                   | 1                                                                                                                                                               | 1                                                                                                                          |
| 7  | Pang et al 2020              | 85      | 17          | 1                                                      | 1                                                                 | 0                                        | 1                                                                                                        | 1                                                                                                                                       | 1                                                                                                                                            | 0                                                                            | 1                                                                                                   | 1                                                                                                                                                               | 1                                                                                                                          |
| 8  | Gasparro et al 2020          | 85      | 17          | 1                                                      | 1                                                                 | 1                                        | 1                                                                                                        | 1                                                                                                                                       | 0                                                                                                                                            | 0                                                                            | 1                                                                                                   | 1                                                                                                                                                               | 1                                                                                                                          |
| 9  | Mahmood et al 2020           | 85      | 17          | 1                                                      | 1                                                                 | 1                                        | 1                                                                                                        | 1                                                                                                                                       | 0                                                                                                                                            | 0                                                                            | 1                                                                                                   | 1                                                                                                                                                               | 1                                                                                                                          |
| 10 | Tsipropoulou et al 2020      | 85      | 17          | 1                                                      | 1                                                                 | 0                                        | 1                                                                                                        | 1                                                                                                                                       | 0                                                                                                                                            | 0                                                                            | 1                                                                                                   | 1                                                                                                                                                               | 1                                                                                                                          |
| 11 | Harper et al 2020            | 85      | 17          | 1                                                      | 1                                                                 | 1                                        | 1                                                                                                        | 1                                                                                                                                       | 0                                                                                                                                            | 0                                                                            | 1                                                                                                   | 1                                                                                                                                                               | 1                                                                                                                          |
| 12 | Perz et al 2020              | 85      | 17          | 1                                                      | 1                                                                 | 1                                        | 1                                                                                                        | 1                                                                                                                                       | 0                                                                                                                                            | 0                                                                            | 1                                                                                                   | 1                                                                                                                                                               | 1                                                                                                                          |
| 13 | Siddique et al 2021          | 90      | 18          | 1                                                      | 1                                                                 | 1                                        | 1                                                                                                        | 1                                                                                                                                       | 1                                                                                                                                            | 0                                                                            | 1                                                                                                   | 1                                                                                                                                                               | 1                                                                                                                          |
| 14 | Midorikawa et al 2021        | 85      | 17          | 1                                                      | 1                                                                 | 1                                        | 1                                                                                                        | 1                                                                                                                                       | 1                                                                                                                                            | 0                                                                            | 1                                                                                                   | 1                                                                                                                                                               | 1                                                                                                                          |
| 15 | Stanculescu, 2021            | 90      | 18          | 1                                                      | 1                                                                 | 1                                        | 1                                                                                                        | 1                                                                                                                                       | 1                                                                                                                                            | 0                                                                            | 1                                                                                                   | 1                                                                                                                                                               | 1                                                                                                                          |
| 16 | Morales-Rodriguez, 2021      | 90      | 18          | 1                                                      | 1                                                                 | 1                                        | 1                                                                                                        | 1                                                                                                                                       | 1                                                                                                                                            | 0                                                                            | 1                                                                                                   | 1                                                                                                                                                               | 1                                                                                                                          |
| 17 | Kassim et al 2021            | 75      | 15          | 1                                                      | 1                                                                 | 0                                        | 0                                                                                                        | 1                                                                                                                                       | 1                                                                                                                                            | 0                                                                            | 1                                                                                                   | 1                                                                                                                                                               | 1                                                                                                                          |
| 18 | Servidio et al 2021          | 80      | 16          | 1                                                      | 1                                                                 | N.K.                                     | 1                                                                                                        | 1                                                                                                                                       | 1                                                                                                                                            | 0                                                                            | 1                                                                                                   | 1                                                                                                                                                               | 1                                                                                                                          |
| 19 | Lathabhavan & Vispute, 2021  | 80      | 16          | 1                                                      | 1                                                                 | N.K.                                     | 1                                                                                                        | 1                                                                                                                                       | 1                                                                                                                                            | 0                                                                            | 1                                                                                                   | 1                                                                                                                                                               | 1                                                                                                                          |
| 20 | Guelmami et al 2021          | 85      | 16          | 1                                                      | 1                                                                 | N.K.                                     | 1                                                                                                        | 1                                                                                                                                       | 1                                                                                                                                            | 0                                                                            | 1                                                                                                   | 1                                                                                                                                                               | 1                                                                                                                          |
| 21 | Ahammed et al 2021           | 80      | 16          | 1                                                      | 1                                                                 | 0                                        | 1                                                                                                        | 1                                                                                                                                       | 1                                                                                                                                            | 0                                                                            | 1                                                                                                   | 1                                                                                                                                                               | 1                                                                                                                          |

Yes= 1, No= 0, N.K.= Not Known
