# Supplementary material for: The Relationship Between Fear of COVID-19 and Depression, Anxiety, and Stress
Source: Atypon-hosted journal article supplement (doi:10.1027/1016-9040/a000464), 2021-10-01

**Figure.** Forest Plot for Anxiety and COVID-19

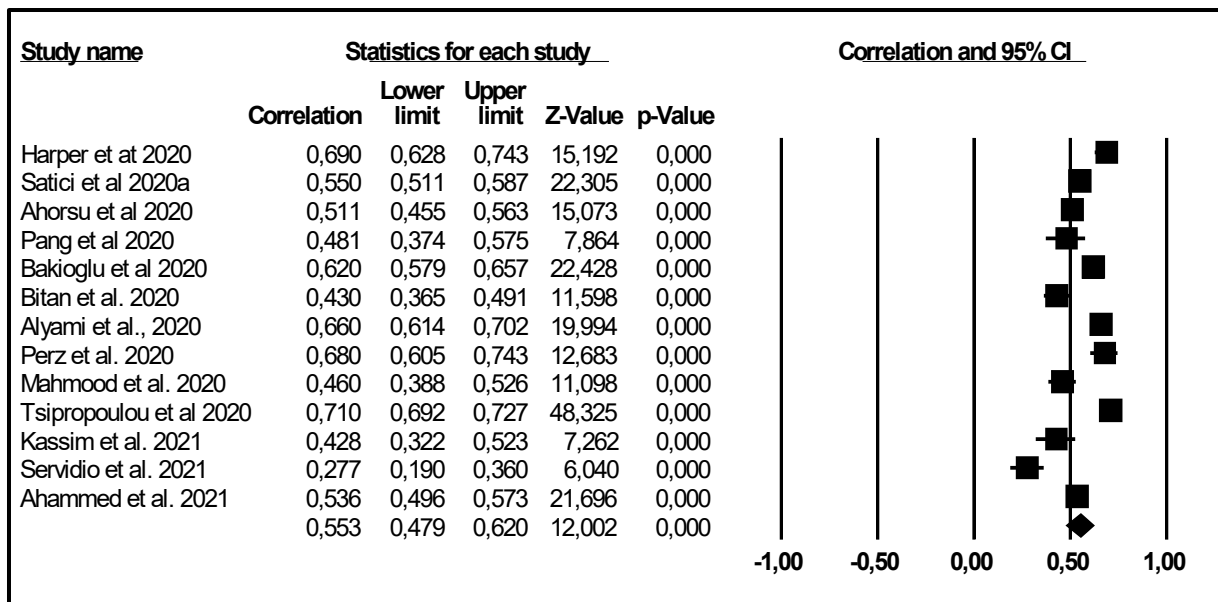

**Figure.** Forest Plot for Depression and COVID-19

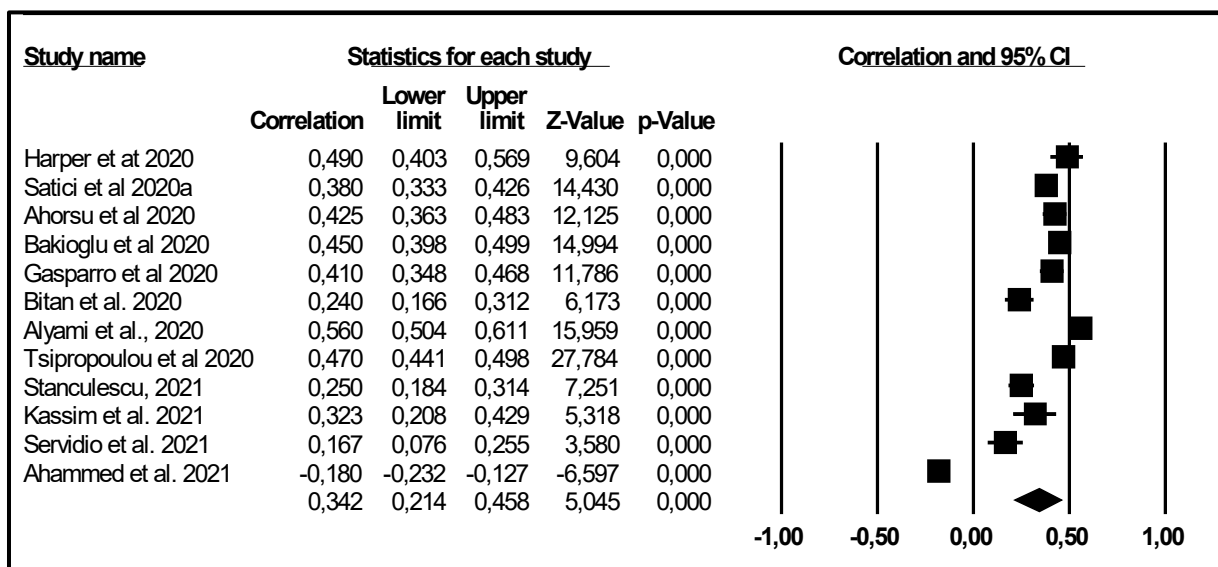

**Figure.** Forest Plot for Stress and COVID-19

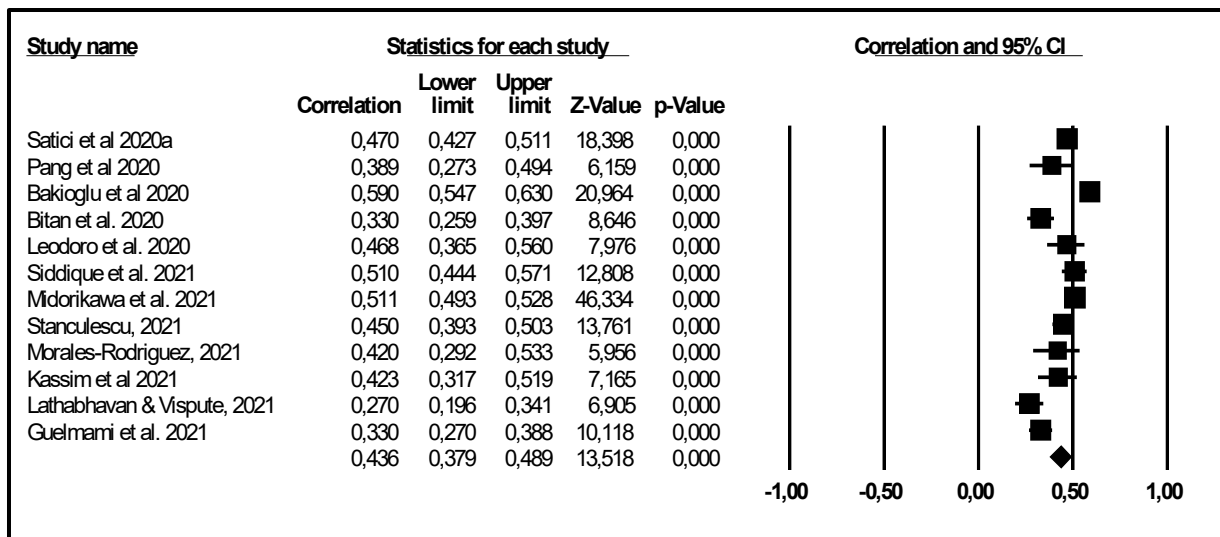

Supplement: 1016-9040_a000464_esm3.pdf [file 1016-9040_a000464_esm3.pdf]
