# Supplementary material for: The Relationship Between Fear of COVID-19 and Depression, Anxiety, and Stress
Source: Atypon-hosted journal article supplement (doi:10.1027/1016-9040/a000464), 2021-10-01
Supplement: 1016-9040_a000464_esm4.pdf [file 1016-9040_a000464_esm4.pdf]

Table 1

*Description of the studies on the Fear of COVID-19 Scale included in the meta-analysis (n =21)*

| <b>Author(s)</b>           | <b>Location</b> | <b>Number of participants and age</b>                             | <b>Screening tools (independents variable)</b>                                                                                      | <b>Findings</b>                                                                                                                                                                                                                                                      |
|----------------------------|-----------------|-------------------------------------------------------------------|-------------------------------------------------------------------------------------------------------------------------------------|----------------------------------------------------------------------------------------------------------------------------------------------------------------------------------------------------------------------------------------------------------------------|
| Ahorsu et al. (2020)       | Iran            | 717 participants (medicine students) M = 31,25 years (SD = 12,68) | The Persian version of Hospital Anxiety and Depression Scale (HADS – Montazeri et al. 2003)                                         | There were significant positive correlations between fear of COVID-19 and depression ( $r = 0.425$ , $p < 0.001$ ), anxiety ( $r = 0.511$ , $p < 0.001$ ).                                                                                                           |
| Alyami et al. (2020a)      | Arabia          | 639 participants M= 34,75 years (SD= 11,8)                        | The Hospital Anxiety and Depression Scale (HADS – Zigmond, & Snaith, 1983)                                                          | Fear of COVID-19 was significantly correlated with HADS-D ( $r = .56$ , $p < .001$ ), HADS-A ( $r = .66$ , $p < .001$ ).                                                                                                                                             |
| Bitan et al. (2020)        | Israel          | 639 participants                                                  | The Depression and Anxiety Stress Scale (DASS-21 – Lovibond & Lovibond, 1995).                                                      | The Fear of COVID-19 scale correlated with the three subscales of the DASS, with the highest correlation being with the anxiety subscale ( $r=0.43$ , $p<.001$ ), followed by stress ( $r=0.33$ , $p<.001$ ), and the lowest for depression ( $r=0.24$ , $p<.001$ ). |
| Labrague et al. (2020)     | Philippines     | 250 participants M= 30,95 years                                   | The Job Stress Scale (JSS – House & Rizzo, 1972).                                                                                   | Fear of COVID–19 had significant positive correlations with psychological distress ( $r = 0.468$ , $p < 0.01$ ).                                                                                                                                                     |
| Tsipropoulou et al. (2020) | Greek           | 2970 participants                                                 | Generalized Anxiety Disorder Assessment (GAD-7 – Spitzer et al., 2006); Patient Health Questionnaire (PHQ-9 – Spitzer et al., 1999) | High statistically significant correlation was found between FCV-19S and GAD-7 ( $r=0.71$ , $p < .001$ ) and moderate correlation was found between FCV-19S and PHQ-9 ( $r=0.47$ , $p < .001$ ) demonstrating a good concurrent validity.                            |

|                        |          |                                                      |                                                                                                              |                                                                                                                                                                                                                                                                                                                                                                                                                    |
|------------------------|----------|------------------------------------------------------|--------------------------------------------------------------------------------------------------------------|--------------------------------------------------------------------------------------------------------------------------------------------------------------------------------------------------------------------------------------------------------------------------------------------------------------------------------------------------------------------------------------------------------------------|
| Bakioglu et al. (2020) | Turkey   | 960 participants M= 29,74 years (SD= 9,64)           | Depression, Anxiety, and Stress Scale (DAS-21 – Lovibond & Lovibond, 1995)                                   | The correlation between the variables were as follows: a negative and significant correlation between the fear of COVID-19 and positivity ( $r = -.23, p < .01$ ), and a positive and significant correlation between prospective anxiety ( $r = .31, p < .01$ ), inhibitory anxiety ( $r = .32, p < .01$ ), depression ( $r = .45, p < .01$ ), anxiety ( $r = .62, p < .01$ ), and stress ( $r = .59, p < .01$ ). |
| Harper et al. (2020)   | UK       | 324 participants M= 34,32 years (SD= 11,71)          | PROMIS Emotional Distress Short Forms (PROMIS-SFs – Cella et al. 2007)                                       | Statistically significant correlation was found between the FCV-19S and depression ( $r = .49$ ) and anxiety ( $r = .69$ ).                                                                                                                                                                                                                                                                                        |
| Satici et al. (2020a)  | Turkey   | 1304 participants M= 29,47 years (SD= 10,54)         | Depression, Anxiety, and Stress Scale (DAS-21 – Lovibond & Lovibond, 1995)                                   | Data analysis revealed significant positive correlations between the Fear of COVID-19 Scale and depression ( $r = .38, p < .001$ ), anxiety ( $r = .55, p < .001$ ), and stress ( $r = .47, p < .001$ ).                                                                                                                                                                                                           |
| Perz et al. (2020)     | USA      | 237 participants M= 30,3 years (SD= 10,2)            | Generalized Anxiety Disorder Scale (GAD-7 – Spitzer, Kroenke, Williams, & Löwe, 2006; Toussaint et al. 2020) | The FCV-19S was significantly correlated with anxiety ( $r = 0.68, p < 0.001$ ).                                                                                                                                                                                                                                                                                                                                   |
| Pang et al. (2020)     | Malaysia | 228 participants M= 26 years                         | Depression, Anxiety, and Stress Scale (DAS-21 – Lovibond & Lovibond, 1995; Musa Fadzil & Zaini, 2007)        | The FCV-19S was significantly correlated with anxiety ( $r = 0.481, p < 0.001$ ) and stress ( $r = 0.389, p < 0.001$ ) subscales of DASS-21.                                                                                                                                                                                                                                                                       |
| Gasparro et al. (2020) | Italy    | 735 participants (dentist) M= 44,8 years (SD= 12,44) | The short version of the DSM-5 Severity Measure for Depression–Adult (SMDA –                                 | The FCV-19S was significantly positively correlated with the depressive symptoms ( $r = 0.41, p < .001$ ).                                                                                                                                                                                                                                                                                                         |

---

|                           |            |                                                             |                                                                                                                               |                                                                                                                                                                                                                                                                   |
|---------------------------|------------|-------------------------------------------------------------|-------------------------------------------------------------------------------------------------------------------------------|-------------------------------------------------------------------------------------------------------------------------------------------------------------------------------------------------------------------------------------------------------------------|
|                           |            |                                                             | Spitzer et al., 2001; Fossati et al., 2015).                                                                                  |                                                                                                                                                                                                                                                                   |
| Mahmood et al. (2020)     | Pakistan   | 501 participants                                            | Generalized Anxiety Disorder Scale (GAD-7 – Spitzer et al., 2006)                                                             | The FCV-19S was also positively correlated with the general anxiety disorder ( $r = .458, p < .01$ ).                                                                                                                                                             |
| Siddique et al. (2021)    | Bangladesh | 521 participants<br>M=24,78; SD=7,00                        | Perceived Stress Scale (PSS-10) (Cohen and Williamson, 1988; Islam, 2020 [Bangla version])                                    | The FCV-19S was also positively correlated with the stress ( $r = .51, p < .01$ ).                                                                                                                                                                                |
| Midorikawa et al. (2021)  | Japanese   | 6750 participants                                           | The extent of the stress associated with COVID-19                                                                             | The FCV-19S was also positively correlated with the stress ( $r = .511, p < .01$ ).                                                                                                                                                                               |
| Stanculescu, (2021)       | Romania    | 809 participants<br>M=32,61; SD=11,25                       | The Perceived Stress Scale-10 (PSS; Cohen & Williamson 1988); The Short Depression-Happiness Scale (SDHS; Joseph et al. 2004) | The fear of COVID-19 score correlated with depression ( $r = .25, p < .01$ ), stress ( $r = .45, p < .01$ ).                                                                                                                                                      |
| Morales-Rodriguez, (2021) | Spain      | 180 participants (university students)<br>M= 20,76; SD=4,59 | Perceived Stress Scale related to COVID-19 (EPP 10-C) (Cohen et al., 2020)                                                    | The FCV-19S was also positively correlated with the stress ( $r = .42, p < .01$ ).                                                                                                                                                                                |
| Kassim et al. (2021)      | Malaysia   | 255 participants                                            | DASS-21 Scale (Lovibond & Lovibond, 1995)                                                                                     | The results show that there were significant relationships between fear of COVID-19-depression (Spearman's rho = 0.323, $p < 0.05$ ), fear of COVID-19-anxiety (Spearman's rho = 0.428, $p < 0.05$ ), fear of COVID-19-stress (Spearman's rho=0.423, $p < 0.05$ ) |

---

|                               |            |                                       |                                                                                                                                           |                                                                                                                                                        |
|-------------------------------|------------|---------------------------------------|-------------------------------------------------------------------------------------------------------------------------------------------|--------------------------------------------------------------------------------------------------------------------------------------------------------|
| Servidio et al., (2021)       | Italy      | 454 participants<br>M= 21,09; SD=1,92 | Depression, Anxiety, and Stress Scales-21 (DASS-21) (Bottesi et al., 2015)                                                                | The FCV-19S-M was significantly correlated with anxiety ( $r = 0.277$ , $p < 0.01$ ) and depression ( $r = 0.167$ , $p < 0.01$ ) subscales of DASS-21. |
| Lathabhavan & Vispute, (2021) | India      | 625 participants                      | The short version (4-items) of Perceived Stress Scale (Cohen et al., 1983)                                                                | The FCV-19S-M was significantly correlated with stress ( $r = 0.27$ , $p < 0.01$ ).                                                                    |
| Guelmami et al. (2021)        | Tunisia    | 874 participants<br>M=28,39; SD=9,32  | 10-Item Perceived Stress Scale (Cohen et al., 1983)                                                                                       | The FCV-19S-M was significantly correlated with stress ( $r = 0.33$ , $p < 0.01$ ).                                                                    |
| Ahammed et al. (2021)         | Bangladesh | 1317 participants                     | Generalized Anxiety Disorder (GAD-7) (Spitzer et al., 2006); WHO-Five Well-being Index (WHO-5) (Mental Health Centre North Zealand, 2020) | The FCV-19S was significantly correlated with anxiety ( $r = 0.536$ , $p < 0.01$ ) and depression ( $r = -0.180$ , $p < 0.01$ )                        |
